# Supplementary material for: The ASCENT Trial: a phase 2 study of induction and consolidation afatinib and chemoradiation with or without surgery in stage III EGFR-mutant NSCLC
Source: PubMed Central journal article supplement — Oncologist. 2024 May 18;29(7):609–18. doi: 10.1093/oncolo/oyae107 (PMC11224994; doi:10.1093/oncolo/oyae107), 2024-05-18
Supplement: oyae107_suppl_supplementary_figure_s1.pdf [file oyae107_suppl_supplementary_figure_s1.pdf]

# Supplemental Figure 1

|            | EGFR mutation            | induction afatinib (2 months) | concurrent chemoradiation  | surgery                                                | consolidation afatinib (planned course 2 years)                    | pattern of first recurrence   |
|------------|--------------------------|-------------------------------|----------------------------|--------------------------------------------------------|--------------------------------------------------------------------|-------------------------------|
|            |                          | start (mg) stop (mg)          | #chemo cycles RT dose (Gy) | procedure ypn                                          | start (mg) stop (mg) time on afatinib (months) reason for stopping |                               |
| Patient 1  | del 19                   | 40                            | 4 63.0                     |                                                        | 40 24                                                              | CNS only                      |
| Patient 2  | del 19                   | 40                            | 4 72.0                     |                                                        | 40 → 30 24                                                         | CNS only                      |
| Patient 3  | L858R                    | 40 → 30                       | 4 66.6                     |                                                        | 30 2 toxicity                                                      | distant metastases (non-CNS)  |
| Patient 4  | del 19                   | 40                            | 2 54.0                     | LUL lobectomy (lingula sparing) 0                      | 40 22                                                              | CNS only                      |
| Patient 5  | del 19                   | 40                            | 2 45.0                     | RUL sleeve lobectomy + RLL wedge (small 2nd primary) 0 | 30 → 20 21                                                         | no known recurrence           |
| Patient 6  | del 19                   | 40                            |                            |                                                        |                                                                    | CNS only                      |
| Patient 7  | L858R                    | 40                            | 2 54.0                     | extended RUL lobectomy 0                               |                                                                    | no known recurrence           |
| Patient 8  | del 19                   | 40 → 30                       | 3 70.2                     |                                                        | 30 → 20 12 progression                                             | locoregional recurrence only  |
| Patient 9  | del 19                   | 40 → 30                       | 2 66.0                     | LLL lobectomy 1                                        | 30 <1 toxicity                                                     | distant metastases (non-CNS)  |
| Patient 10 | L858R                    | 40                            | 1 54.0                     | RUL lobectomy + RLL wedge (organizing pna) 2           |                                                                    | no known recurrence           |
| Patient 11 | del 19                   | 40                            | 2 45.0                     | RUL lobectomy 0                                        |                                                                    | no known recurrence           |
| Patient 12 | del 19                   | 40 → 30                       | 2 54.0                     | RML and RLL lobectomies 1                              | 20 7 toxicity                                                      | CNS and distant metastases    |
| Patient 13 | L858R                    | 40 → 30                       | 2 63.0                     |                                                        |                                                                    | CNS only                      |
| Patient 14 | L858R                    | 40                            | 2 54.0                     | extended RUL lobectomy *                               | 30 22                                                              | CNS only                      |
| Patient 15 | L858R                    | 40 → 30                       | 2 45.0                     | extended RUL lobectomy 2                               | 30 → 20 24                                                         | distant metastases (non-CNS)  |
| Patient 16 | del 19                   | 40                            |                            |                                                        |                                                                    | local and distant progression |
| Patient 17 | exon 18 delE709_T710insD | 40                            | 2 63.0                     |                                                        | 30 8 toxicity                                                      | distant metastases (non-CNS)  |
| Patient 18 | del 19                   | 40                            | 2 66.0                     |                                                        | 30 24                                                              | CNS and distant metastases    |
| Patient 19 | L858R                    | 40 → 30                       | 2 45.0                     | RML lobectomy 0                                        | 30 <1 toxicity                                                     | CNS and distant metastases    |

\*unable to determine, no lymph nodes identified on dissection
